# Supplementary material for: A Motion Detection Algorithm Using Local Phase Information
Source: Comput Intell Neurosci. 2016 Jan 10;2016:7915245. doi: 10.1155/2016/7915245 (PMC4737052; doi:10.1155/2016/7915245)
Supplement: Supplementary file 1 — Video S1: Video illustrating the evaluation of the Phase Motion Indicator (PMI) for the high-way video sequence. (See Figure 6 in article for descriptions of the subpanels). Video S2: Full video for Figure 9. Motion detection of the “highway video” using the phase-based algorithm (left), the Reichardt motion detector (middle), and the Barlow-Levick motion detector (right). Video S3: Full video for Figure 11. Motion detection of the “train station video” using the phase-based algorithm (left), the Reichardt motion detector (middle), and the Barlow-Levick motion detector (right). Video S4: Full video for Figure 12. Motion detection of the “thermal video” using the phase-based algorithm (left), the Reichardt motion detector (middle), and the Barlow-Levick motion detector (right). Video S5: Full video for Figure 13. Motion detection of the “winterstreet video” using the phase-based algorithm (left), the Reichardt motion detector (middel), and the Barlow-Levick motion detector (right). Video S6: Full video for Figure 14. Phase-based motion detection applied on the “highway video” with added Gaussian white noise. Video S7: Full video for Figure 15. Phase-based motion detection applied on the “train sta-tion video” with added Gaussian white noise. Video S8a: Full video for Figure 16a. Segmentation of moving cars based on detected mo-tion in the “highway video” using the phase-based motion detection algorithm. Video S8b: Full video for Figure 16b. Segmentation of moving cars based on detected mo-tion in the “highway video” using optic flow algorithm. Video S9a: Full video for Figure 17a. Segmentation of moving cars based on detected mo-tion in the “highway video” using the phase-based motion detection algorithm. Video S9b: Full video for Figure 17b. Segmentation of moving cars based on detected mo-tion in the “train station video” using optic flow algorithm. Video S10a: Full video for Figure 18a. Segmentation of moving cars based on detected mo-tion in the “thermal video” u [file 7915245.f1.zip]

Archive with 15 entries (15 files):
- videoS11b.mp4
- videoS1.mp4
- videoS2.mp4
- videoS3.mp4
- videoS4.mp4
- videoS5.mp4
- videoS6.mp4
- videoS7.mp4
- videoS8a.mp4
- videoS8b.mp4
- videoS9a.mp4
- videoS9b.mp4
- videoS10a.mp4
- videoS10b.mp4
- videoS11a.mp4
